# Supplementary material
Source: MDPI journal article supplement (https://www.mdpi.com/1424-8247/14/8/824)
Supplement: s1 [file s1]

# **Genetic variants and haplotypes in the renin–angiotensin system could affect bleeding complications among Korean mechanical heart valve patients on warfarin**

Joo Hee Kim, PharmD, PhD<sup>1,2\*</sup>, Jeong Yee, PhD<sup>1\*</sup>, Byung Chul Chang, MD, PhD<sup>3,4</sup>, Jee Eun Chung, PhD<sup>5</sup>, Kyung Eun Lee<sup>6</sup>, Hye Sun Gwak, PharmD, PhD<sup>1</sup>.

<sup>1</sup>College of Pharmacy and Graduate School of Pharmaceutical Sciences, Ewha Womans University, 52 Ewhayeodae-gil, Seodaemun-gu, Seoul 03760, Korea

<sup>2</sup>College of Pharmacy & Institute of Pharmaceutical Science and Technology, Ajou University, 206 Worldcup-ro, Yeongtong-gu, Suwon 16499, Korea

<sup>3</sup>Department of Thoracic and Cardiovascular Surgery, Bundang CHA Medical Center, CHA University, 59 Yatap-ro, Bundang-gu, Seongnam 13496, Korea

<sup>4</sup>Department of Thoracic & Cardiovascular Surgery, Yonsei University Medical Center, 50-1 Yonsei-ro, Seodaemun-gu, Seoul 03722, Korea

<sup>5</sup>College of Pharmacy, Hanyang University, 55 Hanyangdeahak-ro, Sangnok-gu, Ansan 15588, Korea

<sup>6</sup>College of Pharmacy, Chungbuk National University, 660-1, Yeonje-ri, Osong-eup, Heungdeok-gu, Cheongju 28160, Korea

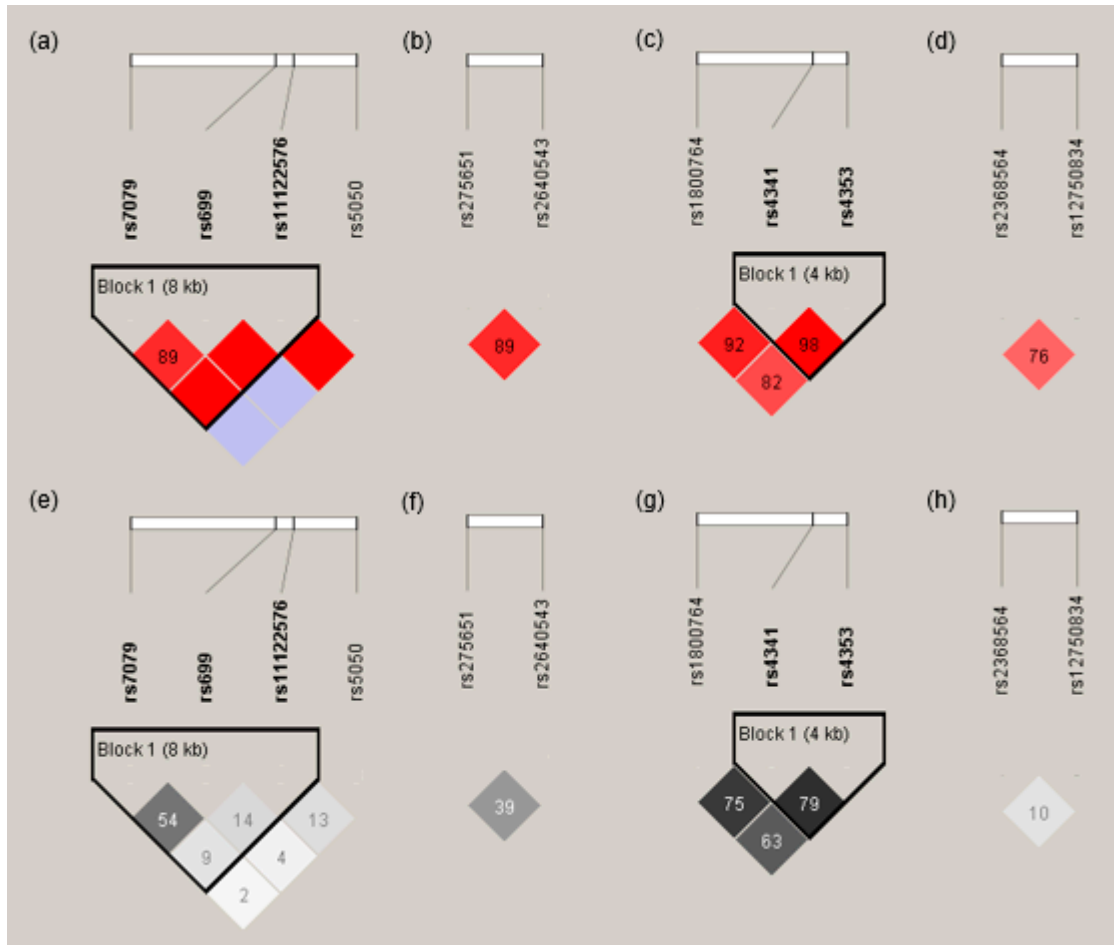

**Supplementary Figure S1. Linkage disequilibrium patterns and relative position of SNPs among study patients.** Present SNPs were in *AGT* ((a) and (e)), *REN* ((b) and (f)), *ACE* ((c) and (g)) and *AGTRI* ((d) and (h)), respectively. Values in squares are the pairwise calculation of  $D'$  ((a)-(d)) or  $r^2$  ((e)-(h)). Empty squares indicate  $D'=1.0$  or  $r^2=1.0$ .

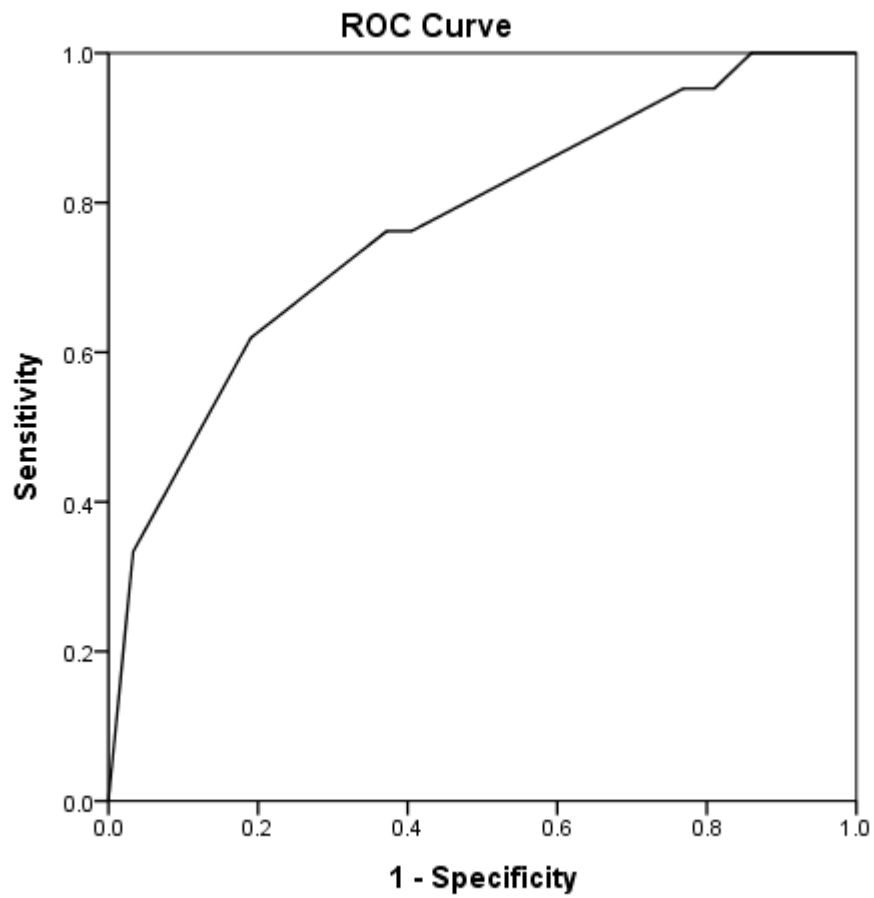

**Supplementary Figure S2. Area under the receiver operating characteristic curve (AUROC) for bleeding complications at therapeutic INRs. The AUROC value was 0.771 (95% CI 0.656-0.886,  $p < 0.001$ ).**
